# Supplementary material for: Developing a Standardization Algorithm for Categorical Laboratory Tests for Clinical Big Data Research: Retrospective Study
Source: PubMed Central journal article supplement (PMC6740165; doi:10.2196/14083), 2019-08-29
Supplement: medinform_v7i3e14083_app1.pdf [file medinform_v7i3e14083_app1.pdf]

Supplementary table 1

| Category               | Classified laboratory tests |                                                                                                               | SNOMED mapping    |                        |
|------------------------|-----------------------------|---------------------------------------------------------------------------------------------------------------|-------------------|------------------------|
|                        | Number                      | Laboratory tests                                                                                              | Value set         | SNOMED Concept_id      |
| Urine color tests      | 2                           | Urinalysis:<br>Color, Turbidity                                                                               | Clear             | 263707001              |
|                        |                             |                                                                                                               | Cloudy            | 81858005               |
|                        |                             |                                                                                                               | Orange color      | 371242008              |
|                        |                             |                                                                                                               | Purple color      | 371250004              |
|                        |                             |                                                                                                               | Brown color       | 371254008              |
|                        |                             |                                                                                                               | Green color       | 371246006              |
|                        |                             |                                                                                                               | Blue color        | 405738005              |
|                        |                             |                                                                                                               | Red color         | 371240000              |
|                        |                             |                                                                                                               | Black color       | 371252007              |
|                        |                             |                                                                                                               | Yellow color      | 371244009              |
|                        |                             |                                                                                                               | Dark yellow color | 720001001              |
|                        |                             |                                                                                                               | Pink color        | 371243003              |
|                        |                             |                                                                                                               | Turbid            | 263906002              |
|                        |                             |                                                                                                               | Milky white       | 50935005               |
|                        |                             |                                                                                                               | Amber             | None                   |
| Straw                  | None                        |                                                                                                               |                   |                        |
| Colorless              | 263716002                   |                                                                                                               |                   |                        |
| Bloody                 | None                        |                                                                                                               |                   |                        |
| Urine dipstick tests   | 14                          | Urinalysis:<br>Glucose, Albumin, Ketones, Blood,<br>Urobilinogen, Bilirubin,<br>Leukocyte Esterase,<br>...    | Trace             | 260405006              |
|                        |                             |                                                                                                               | +                 | 441614007<br>260347006 |
|                        |                             |                                                                                                               | ++                | 441517005<br>260348001 |
|                        |                             |                                                                                                               | +++               | 441521003<br>260349009 |
|                        |                             |                                                                                                               | ++++              | 260350009              |
|                        |                             |                                                                                                               | Negative          | Negative               |
|                        |                             |                                                                                                               |                   |                        |
| Blood type tests       | 3                           | Rh type, ABO group                                                                                            | RhD positive      | 165747007              |
|                        |                             |                                                                                                               | RhD negative      | 165746003              |
|                        |                             |                                                                                                               | Weak D phenotype  | 89109006               |
|                        |                             |                                                                                                               | Blood group A     | 112144000              |
|                        |                             |                                                                                                               | Blood group B     | 112149005              |
|                        |                             |                                                                                                               | Blood group O     | 58460004               |
|                        |                             |                                                                                                               | Blood group AB    | 165743006              |
| Presence finding tests | 453                         | Anti - HCV antivody, Anti - HIV<br>antibody,<br>HBs Ag, HBs Ab, Hbe Ag,<br>Barbiturate Screen, Opiate Screen, | Positive          | 10828004               |
|                        |                             |                                                                                                               | Negative          | 260385009              |
|                        |                             |                                                                                                               | Weakly positive   | 260408008              |
| Pathogeneses tests     | 8                           | RPR type, VDRL, TPLA, VDRL(CSF),<br>Treponema pallidum                                                        | Non-Reactive      | 131194007              |
|                        |                             |                                                                                                               | Weakly-reactive   | 117006002              |
|                        |                             |                                                                                                               | Reactive          | 11214006               |
