# Supplementary material for: Developing a Standardization Algorithm for Categorical Laboratory Tests for Clinical Big Data Research: Retrospective Study
Source: PubMed Central journal article supplement (PMC6740165; doi:10.2196/14083), 2019-08-29

# SALT-C algorithm:

Standardization Algorithm for  
Laboratory Test – Categorical Results)

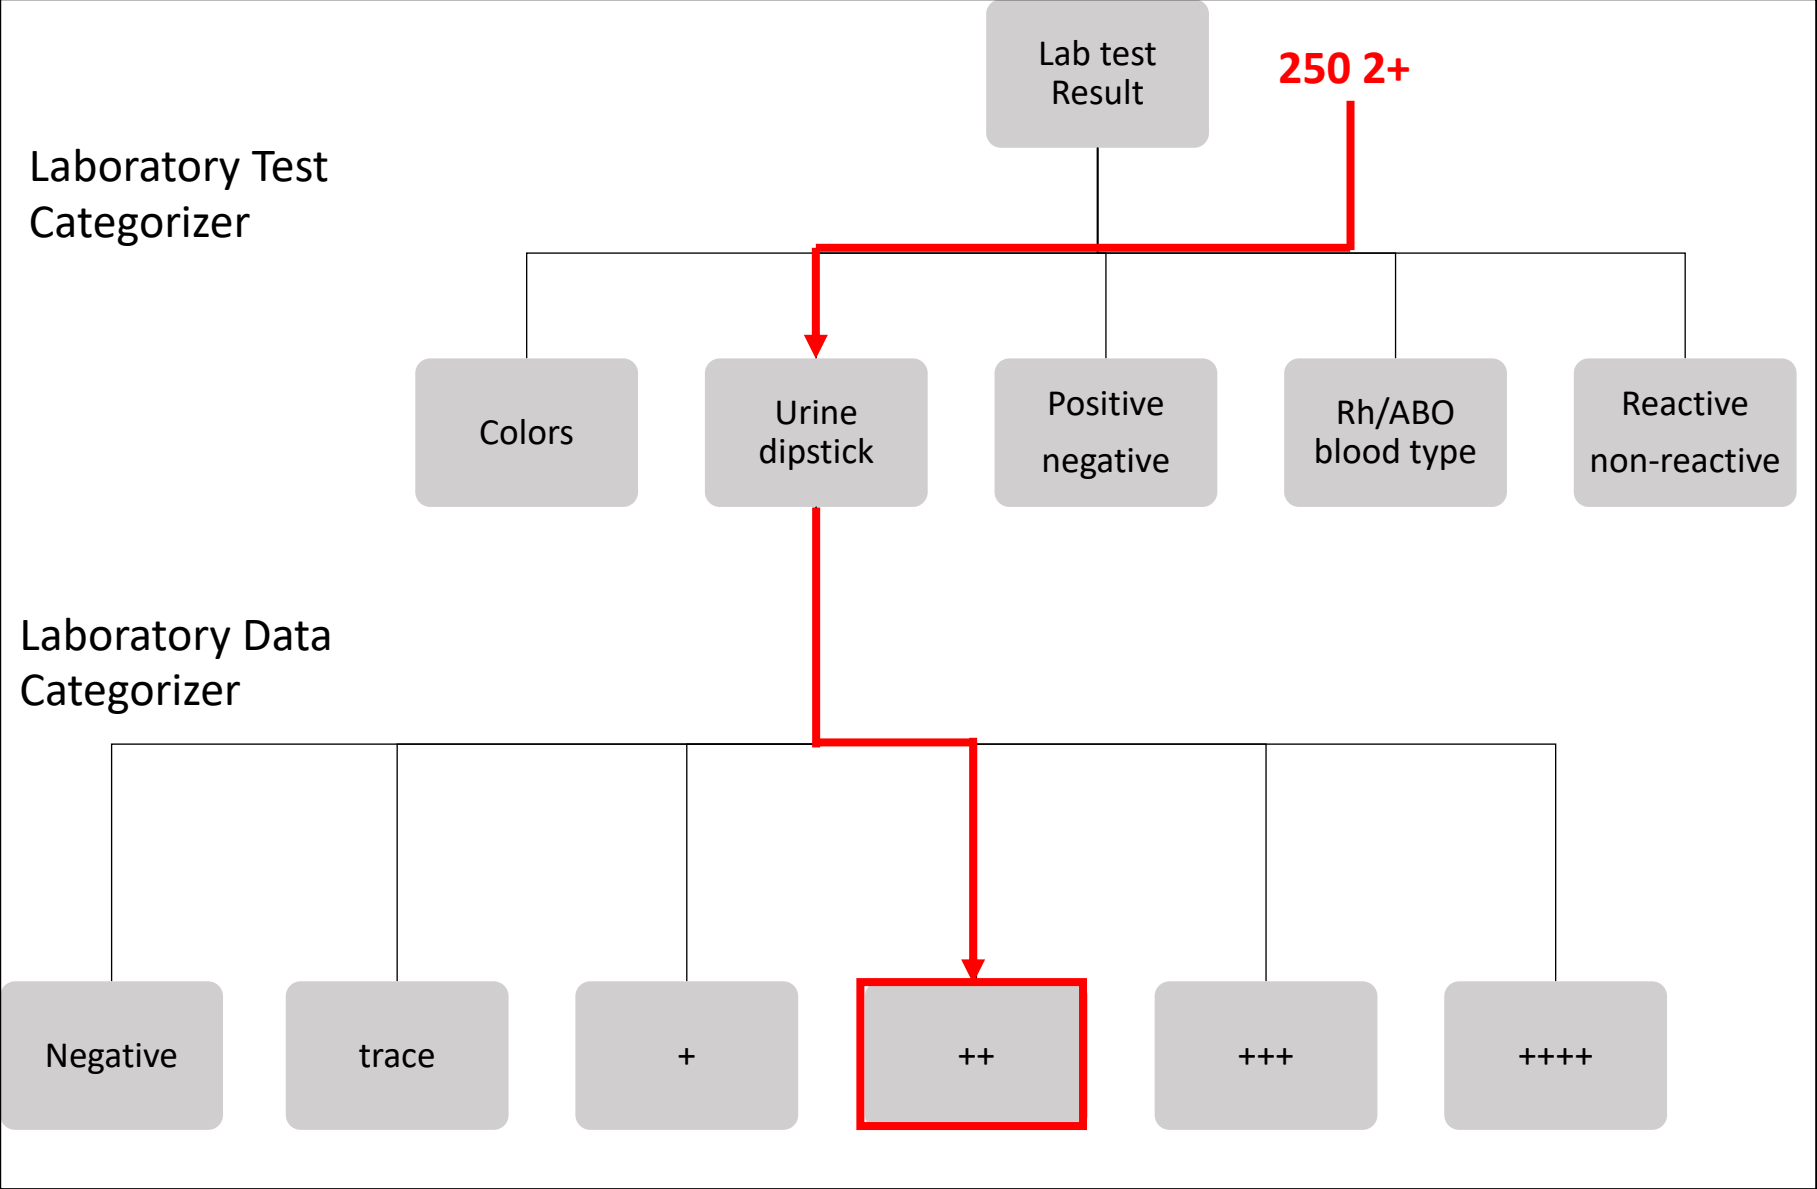

Supplement: medinform_v7i3e14083_app2.pdf [file medinform_v7i3e14083_app2.pdf]
