# Supplementary material for: Developing a Standardization Algorithm for Categorical Laboratory Tests for Clinical Big Data Research: Retrospective Study
Source: PubMed Central journal article supplement (PMC6740165; doi:10.2196/14083), 2019-08-29
Supplement: medinform_v7i3e14083_app3.pdf [file medinform_v7i3e14083_app3.pdf]

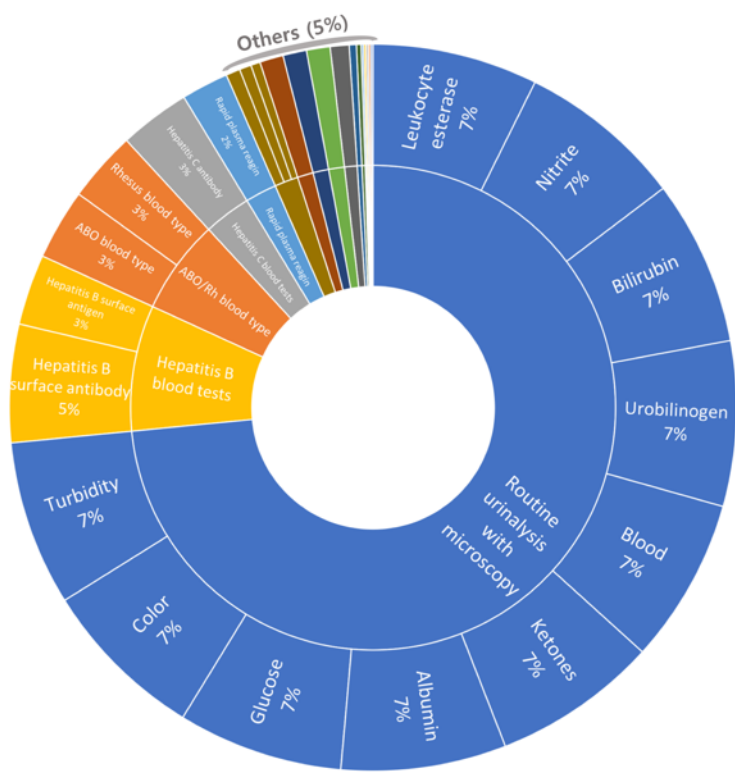

- Routine urinalysis with microscopy
- ABO/Rh blood type
- Hepatitis C blood tests
- Hepatitis B blood tests
- Rapid plasma reagin
- Venereal disease research laboratory
- Human immunodeficiency virus
- Treponema pallidum latex agglutination
- Hepatitis A blood tests
- Hepatitis B blood tests
- Helicobacter pylori
- Cell count with differential, cerebrospinal fluid
- Cell count with differential, ascitic fluid
- Mycoplasma pneumoniae
- Human chorionic gonadotropin
- Cell count with differential, ascitic fluid
- Rubella antibodies, serum
